# Supplementary material for: Antioxidant and Anti‐Inflammatory Effects of Herbal Formula SC‐E3 in Lipopolysaccharide‐Stimulated RAW 264.7 Macrophages
Source: Hindawi journal article supplement (doi:10.1155/2017/1725246), 2017-01-01
Supplement: f1 [file 1725246.f1.pdf]

**(a)**

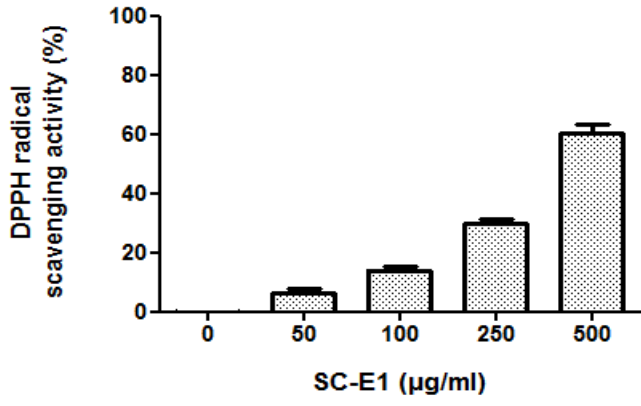

**(b)**

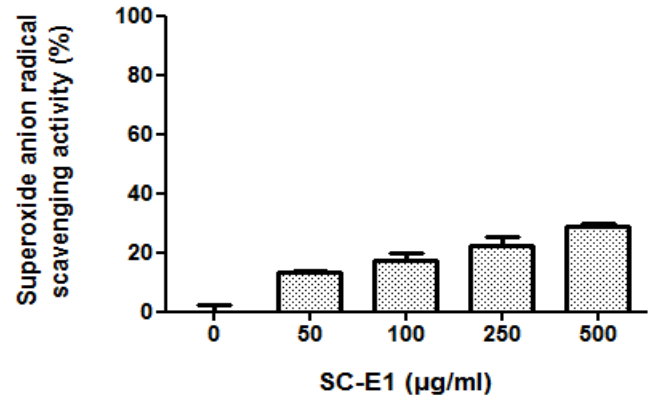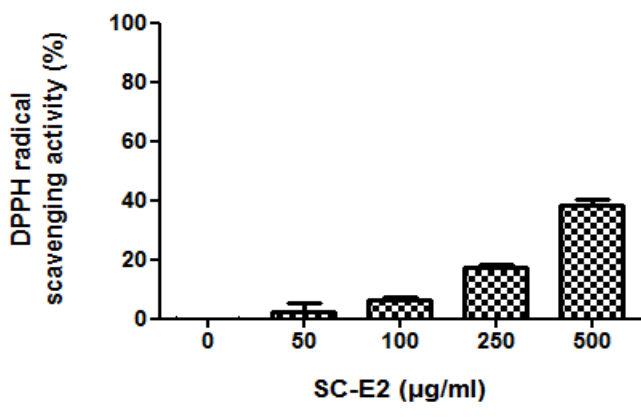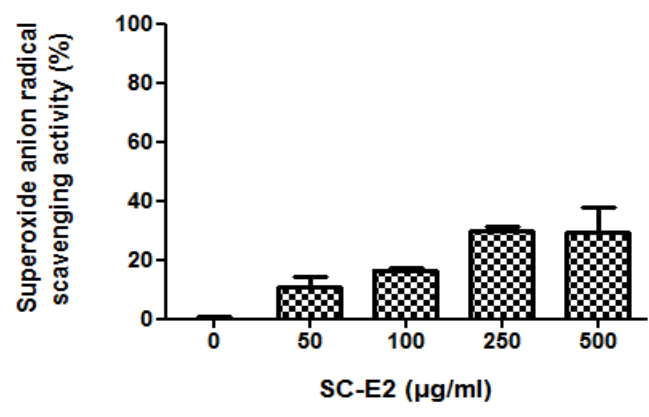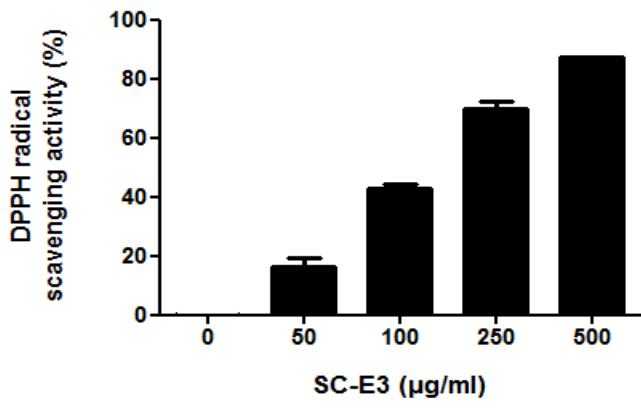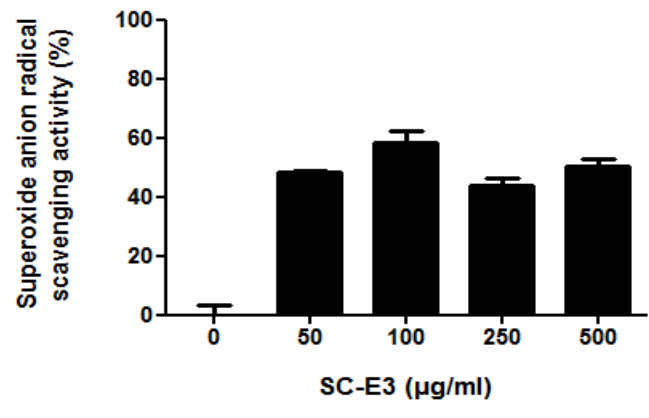

**Supplementary FIGURE 1**
